# Supplementary material for: Effective Degradation of 1,4-Dioxane by UV-Activated Persulfate: Mechanisms, Parameters and Environmental Impacts
Source: MDPI journal article supplement (doi:10.3390/w16091281), 2024-04-29
Supplement: s1 [file s1]

## Supplementary Information

# Effective Degradation of 1,4-Dioxane by UV-Activated Persulfate: Mechanisms, Parameters and Environmental Impacts

Xiuneng Zhu <sup>1</sup>, Jie Qiu <sup>1</sup>, Yexing Wang <sup>1</sup>, Yulin Tang <sup>1,2</sup> and Yongji Zhang <sup>1,2,\*</sup>

<sup>1</sup> State Key Laboratory of Pollution Control and Resource Reuse, College of Environmental Science and Engineering, Tongji University, Shanghai 200092, China

<sup>2</sup> Shanghai Institute of Pollution Control and Ecological Security, Shanghai 200092, China

\* Correspondence: zhangyongji@tongji.edu.cn; Tel.: +86-13701815538

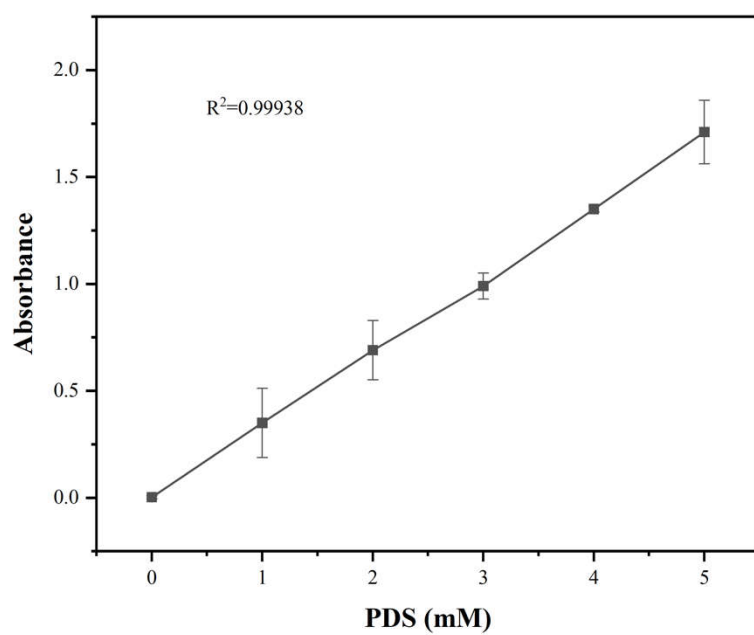

**Figure S1.** PDS Concentration Detection Standard Curve.

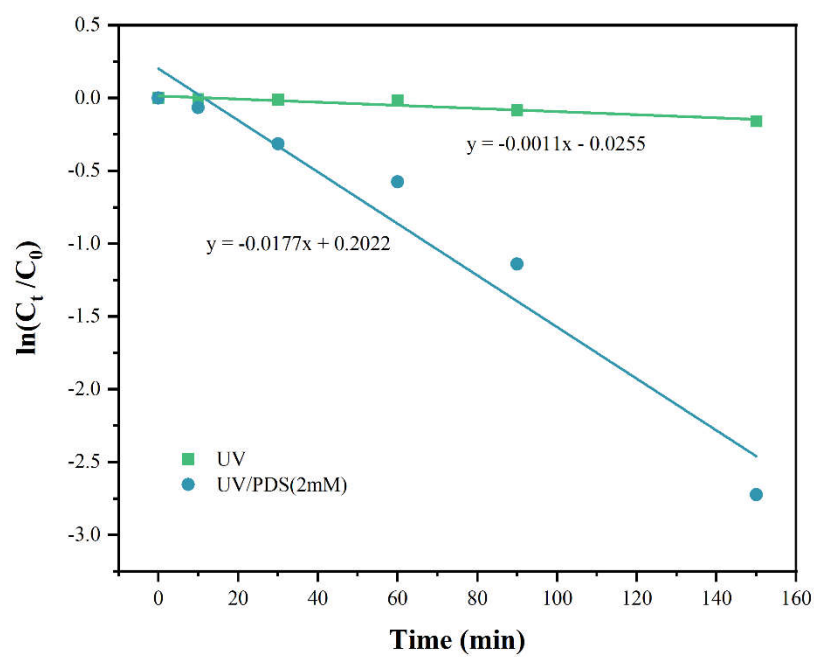

**Figure S2.** Kinetics model of UV and UV/PDS on 1,4-dioxane removal.

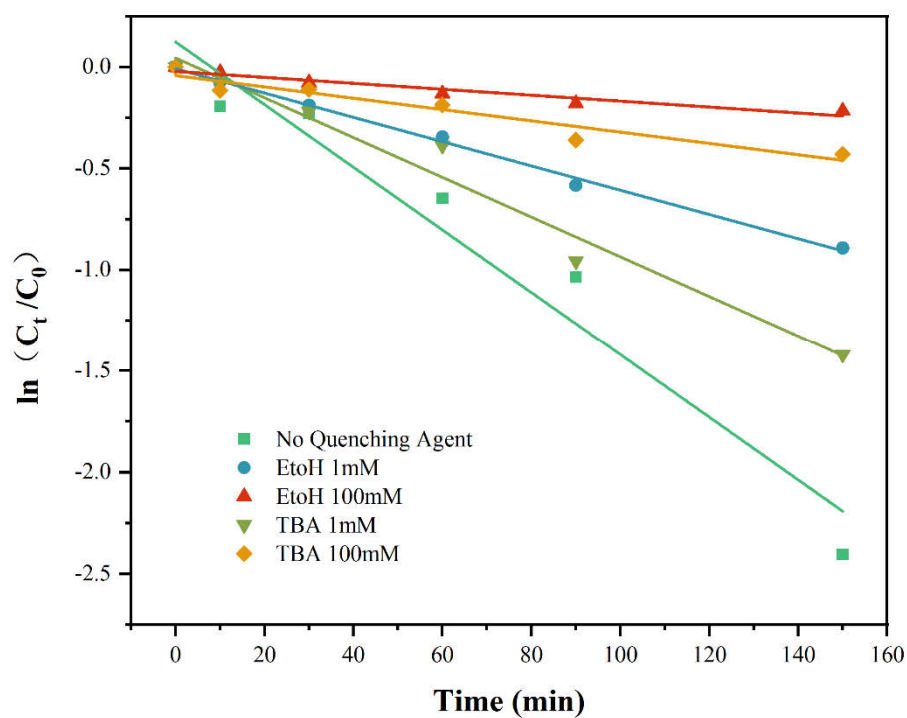

**Figure S3.** Kinetics Model of TBA and EtOH on 1,4-Dioxane removal.

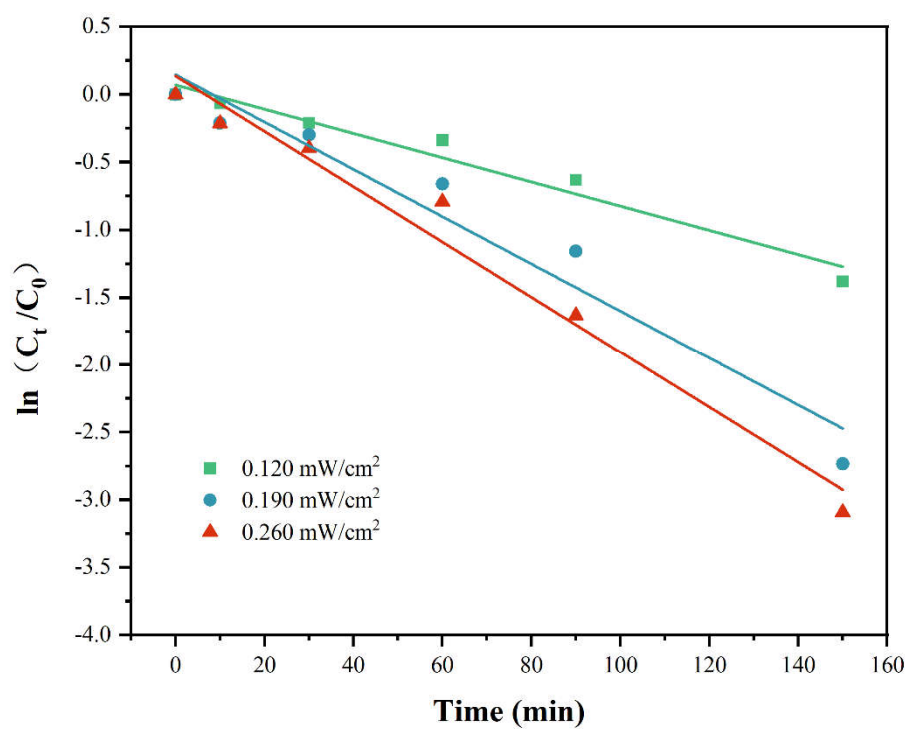

**Figure S4.** Kinetics model of UV intensity variation on 1,4-dioxane removal.

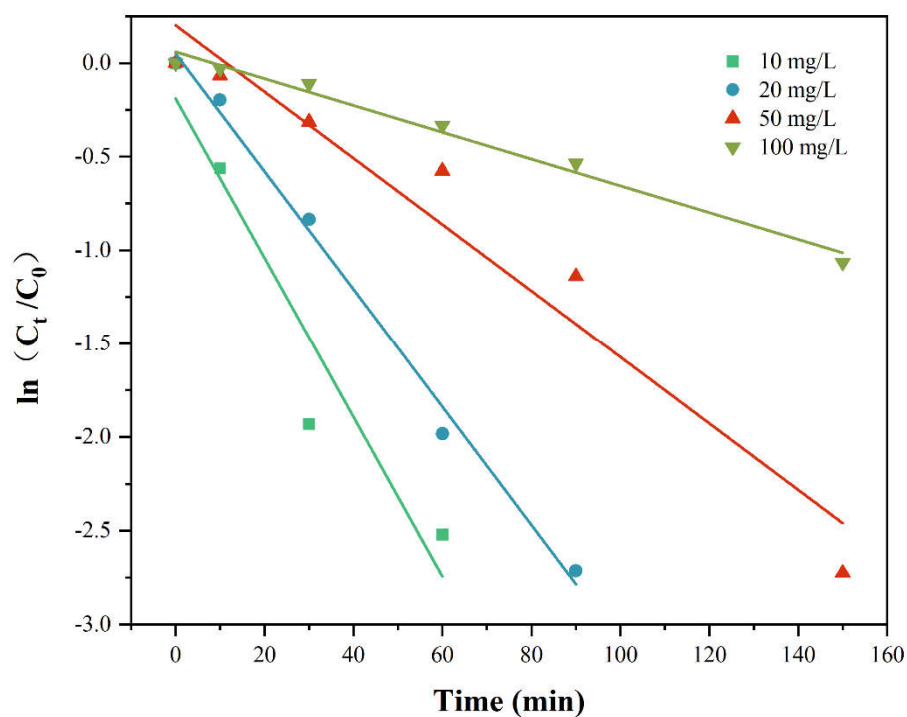

**Figure S5.** Kinetics model of 1,4-dioxane initial concentrations variation on its removal.

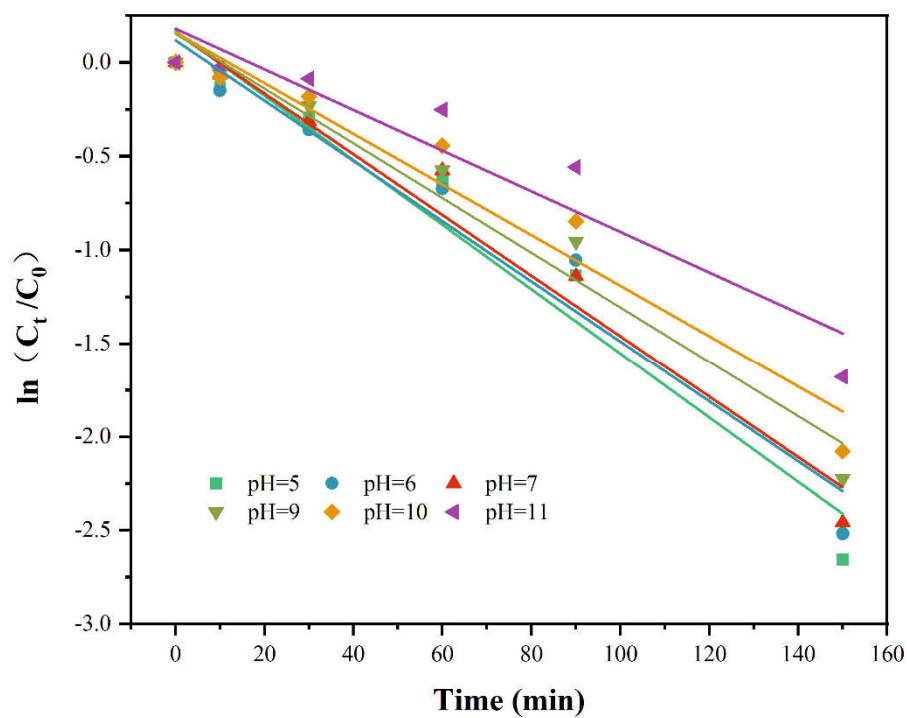

**Figure S6.** Kinetics model of pH values variation on 1,4-dioxane removal.
